# Supplementary material for: Hierarchical CoxAlylayered double hydroxide@carbon composites derived from metal–organic frameworks with efficient broadband electromagnetic wave absorption
Source: Royal Society of Chemistry journal article supplement (doi:10.1039/d0tc00622j), 2020-01-01
Supplement: d0tc00622j1.pdf [file d0tc00622j1.pdf]

**Hierarchical Co<sub>x</sub>Al<sub>y</sub> layered double hydroxides@carbon composites derived  
from the metal-organic framework with efficient broadband electromagnetic wave  
absorption**

*Wen Bo, Haibo Yang\*, Lei Wang\*, Yun Qiu*

Shaanxi Key Laboratory of Green Preparation and Functionalization for Inorganic Materials, School of  
Materials Science and Engineering, Shaanxi University of Science and Technology, Xi'an 710021, China

\*Corresponding authors. yanghaibo@sust.edu.cn (Haibo Yang)

\*Corresponding authors. wangleiorganic@126.com (Lei Wang)

---

\* Corresponding author. Tel: +86-29-86168688; Fax: +86-29-86168688. Email: yanghaibo@sust.edu.cn

\*Corresponding author. Tel: +86-29-86168688; Fax: +86-29-86168688. Email: wangleiorganic@126.com

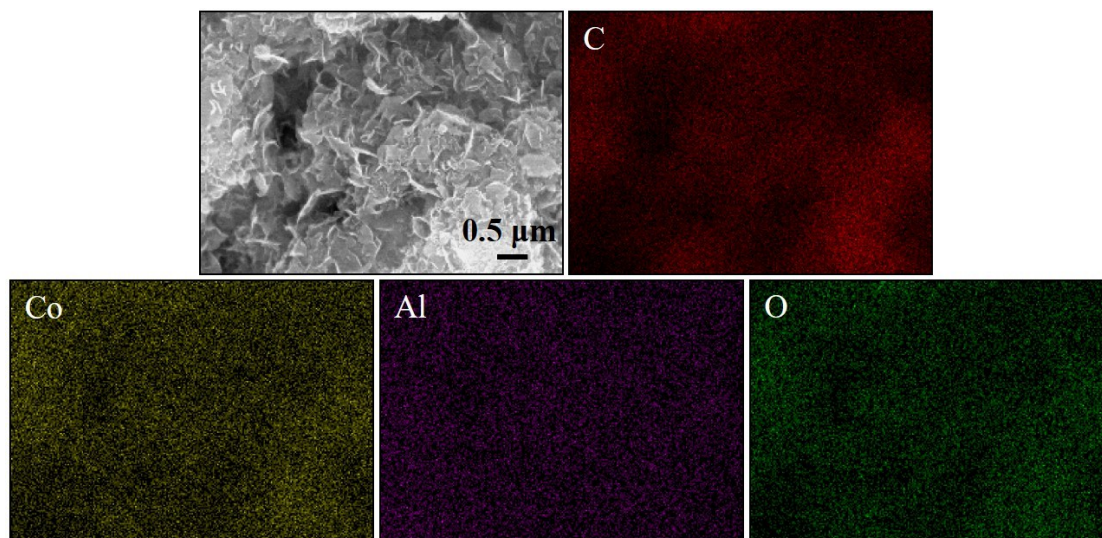

Figure S1 Elemental mapping distribution of the hierarchical LDH@C-2 composites.

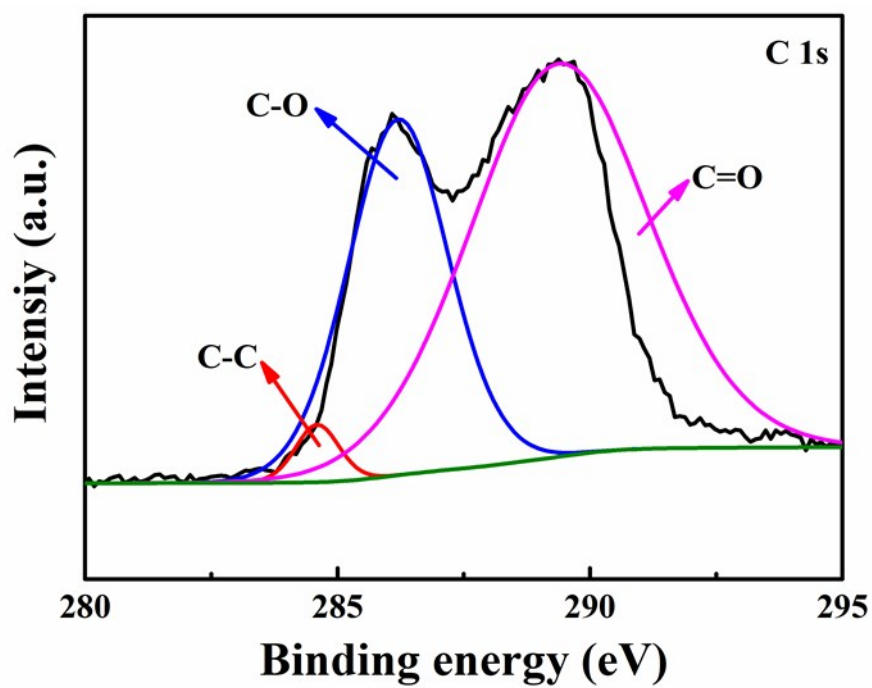

Figure S2 XPS spectra of C 1s for LDH@C-2 composite.

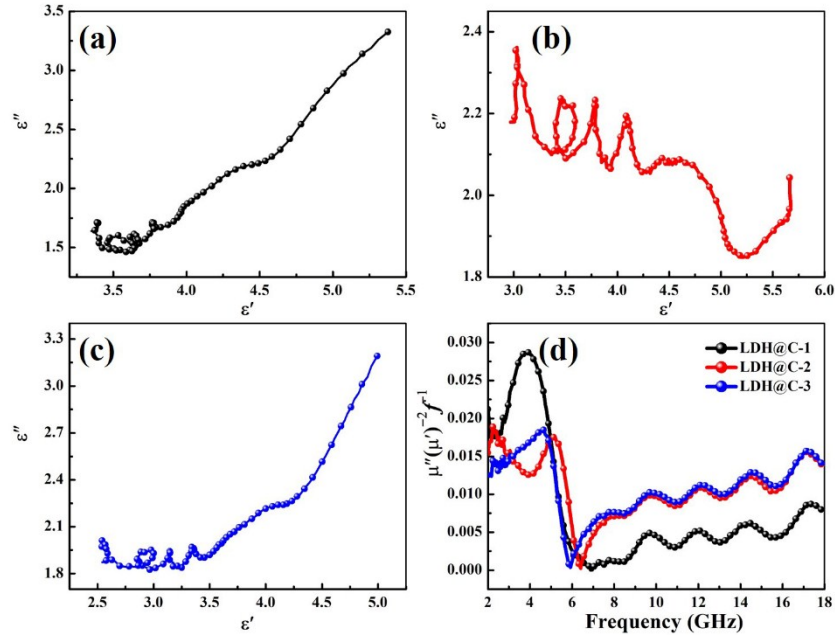

Figure S3 Cole–Cole semicircles ( $\epsilon'$  versus  $\epsilon''$ ) of (a) LDH@C-1, (b) LDH@C-2 and (c) LDH@C-3 composites. (d)  $\mu''(\mu')^{-2}f^{-1}$  (representing eddy current loss) values of the as-prepared samples.

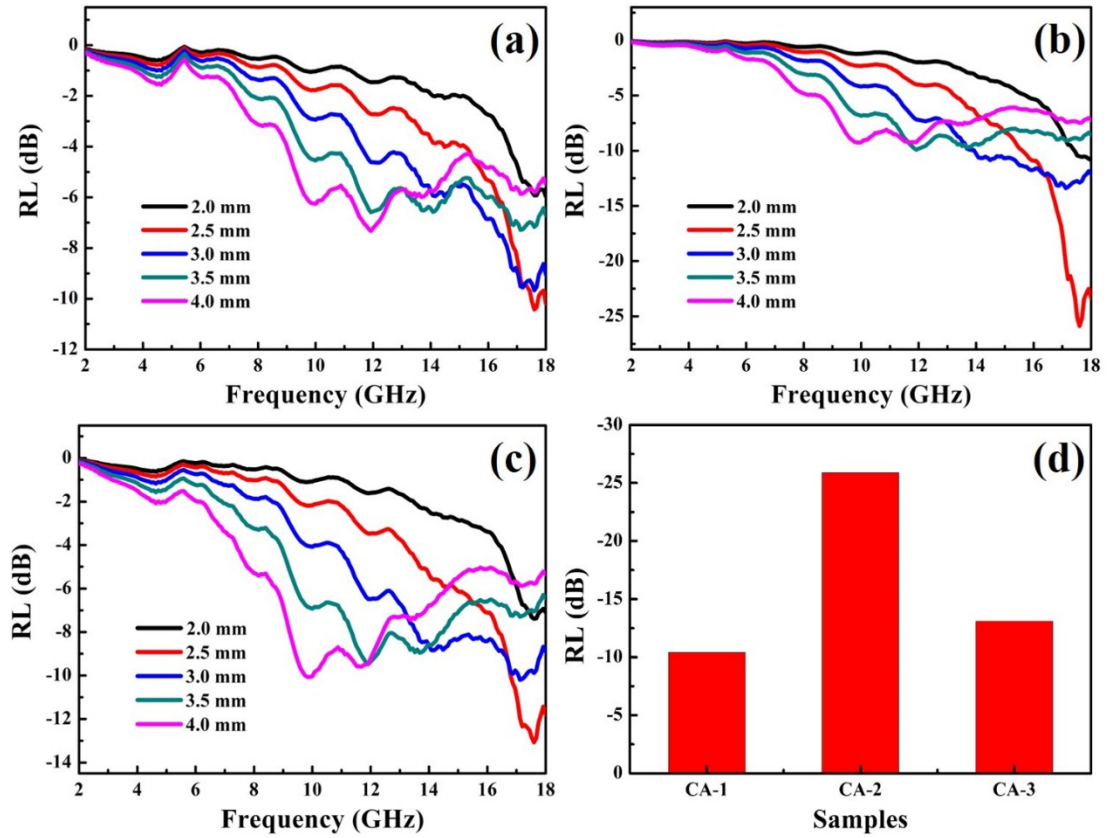

Figure S4 Reflection loss (RL) of the CA-1, CA-2 and CA-3 composites and their corresponding RL values at the thickness of 2.5 mm.

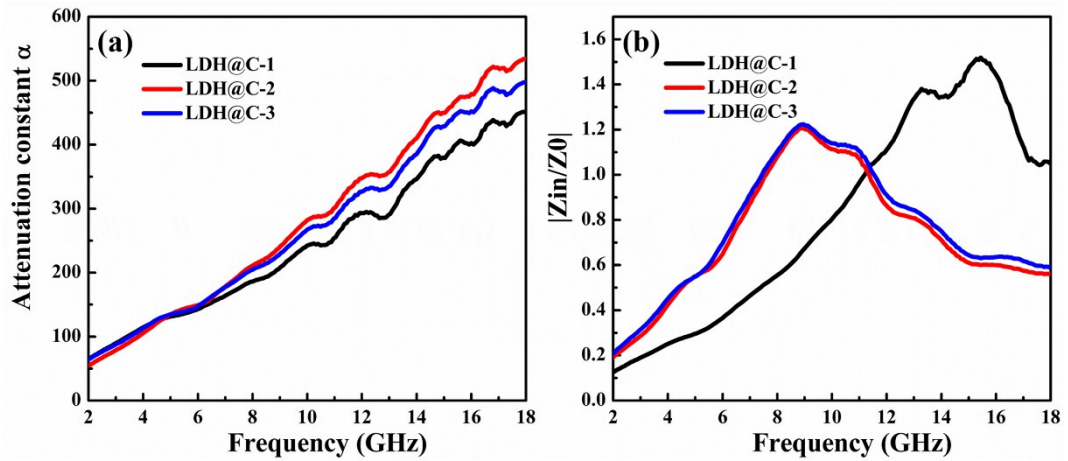

Figure S5 (a) Impedance matching  $|Z_{in}/Z_0|$ , (b) attenuation constant  $\alpha$  of LDH@C-1, LDH@C-2 and LDH@C-3 composites.
